# Supplementary material for: A New Model for Pore Formation by Cholesterol-Dependent Cytolysins
Source: PubMed Central journal article supplement (PMC4140638; doi:10.1371/journal.pcbi.1003791), 2014-08-21

Representative structures

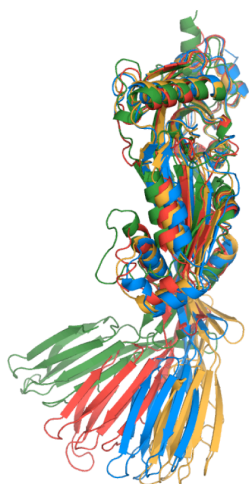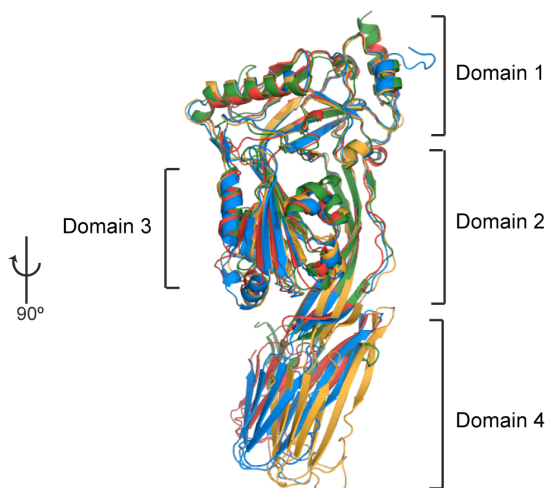

PFO

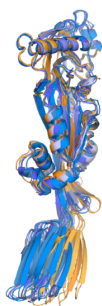

90°

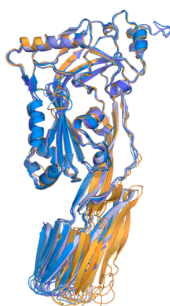

ILY

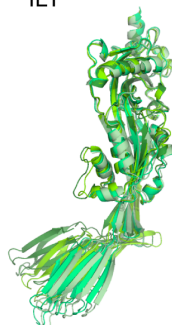

90°

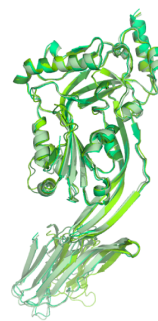

ALO

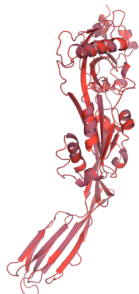

90°

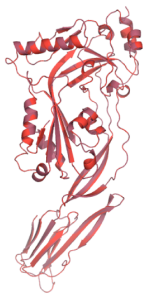

SLO & SLY

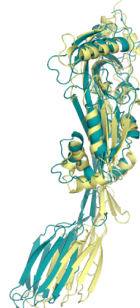

90°

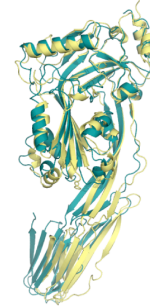

Supplement: pcbi.1003791.s003.pdf [file pcbi.1003791.s003.pdf]
