# Supplementary material for: A New Model for Pore Formation by Cholesterol-Dependent Cytolysins
Source: PubMed Central journal article supplement (PMC4140638; doi:10.1371/journal.pcbi.1003791), 2014-08-21

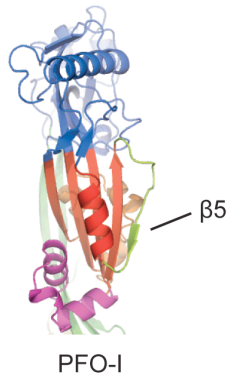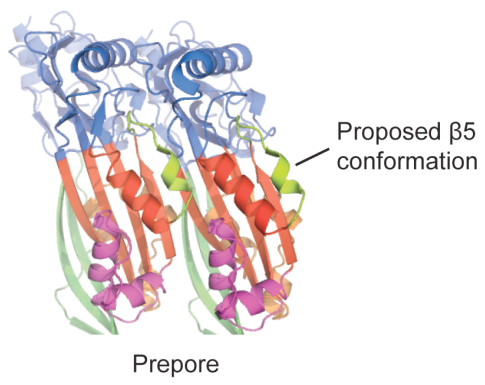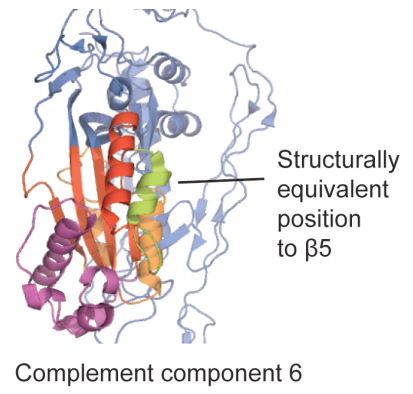

Supplement: pcbi.1003791.s005.pdf [file pcbi.1003791.s005.pdf]
