# Supplementary material for: A New Model for Pore Formation by Cholesterol-Dependent Cytolysins
Source: PubMed Central journal article supplement (PMC4140638; doi:10.1371/journal.pcbi.1003791), 2014-08-21

**A**

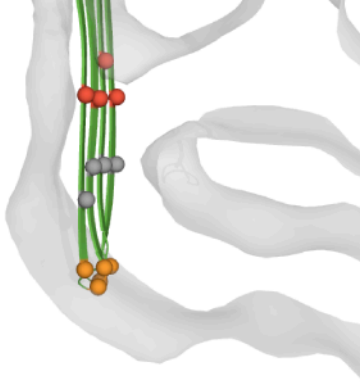

**B**

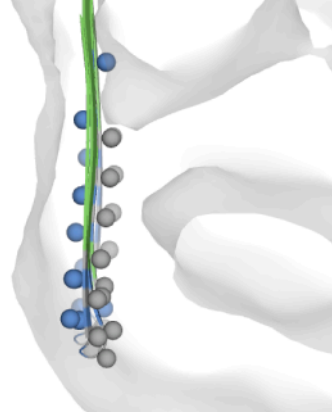

Supplement: pcbi.1003791.s008.pdf [file pcbi.1003791.s008.pdf]
